# Supplementary material for: SLC26A4 correlates with homologous recombination deficiency and patient prognosis in prostate cancer
Source: J Transl Med. 2022 Jul 14;20:313. doi: 10.1186/s12967-022-03513-5 (PMC9281181; doi:10.1186/s12967-022-03513-5)
Supplement: Supplementary file 14 — Additional file 14: Table S11. The correlation between immune cell type and patient survival based on Cox analyses. [file 12967_2022_3513_MOESM14_ESM.xlsx]

## Sheet: Sheet1
Table S11. The correlation between immune cell type and patient survival based on Cox analyses.
Cell types	HR	Low 95%CI	High 95%CI	p.value
Th1	43669.7	38.2832	4.9814e+07	0.00293145
Th2	0.00178993	2.57413e-05	0.124463	0.00346934
Exhausted	1.35424e-05	3.94734e-09	0.0464606	0.00695668
CD4_naive	4.05396e-06	3.38642e-10	0.0485309	0.00955677
Macrophage	1128.11	0.255877	4.97363e+06	0.100674
DC	1226.58	0.113358	1.3272e+07	0.133463
B_cell	0.00936581	1.60415e-05	5.46822	0.150664
Central_memory	0.000457059	6.93327e-09	30.1305	0.174326
CD8_naive	0.0209011	5.80072e-05	7.53105	0.197828
NK	41.5825	0.0669628	25821.9	0.255946
Monocyte	0.0498983	0.000242458	10.2692	0.270033
nTreg	1113.15	0.00352738	3.5128e+08	0.277551
MAIT	0.0233732	7.10547e-06	76.8856	0.363322
Th17	0.0173506	1.51153e-06	199.164	0.395329
CD8_T	158.319	1.85035e-05	1.3546e+09	0.534025
CD4_T	0.180811	0.000278215	117.508	0.604766
Neutrophil	3.36631	0.0120428	940.976	0.672783
Gamma_delta	6.97768	0.000778056	62576.5	0.675685
Tfh	1.91051	0.0851281	42.8772	0.68338
iTreg	0.37177	0.00196825	70.221	0.711364
Tr1	0.518408	0.0106381	25.2626	0.74039
InfiltrationScore	1.52809	0.0927407	25.1784	0.766772
NKT	1.43536	4.05959e-05	50750.6	0.946076
Cytotoxic	1.11079	0.0220901	55.8556	0.958078
Effector_memory	0	0	Inf	0.995885
